# Supplementary material for: Nanoarchitectonics on Z-scheme and Mott–Schottky heterostructure for photocatalytic water oxidation via dual-cascade charge-transfer pathways
Source: Royal Society of Chemistry journal article supplement (doi:10.1039/d3na00182b), 2023-01-01
Supplement: d3na00182b1.pdf [file d3na00182b1.pdf]

## Supporting Information

### Nanoarchitectonics on Z-scheme and Mott-Schottky heterostructure for photocatalytic water oxidation via dual cascade charge transfer pathways

Yao Li, Siyuan Liu, Runlu Liu, Jian Pan, Xin Li, Jianyu Zhang, Xiaoxiao Zhang, Yixin Zhao, Dawei Wang, Hengdao Quan, Shenmin Zhu\*

#### 1. Supplementary Figures

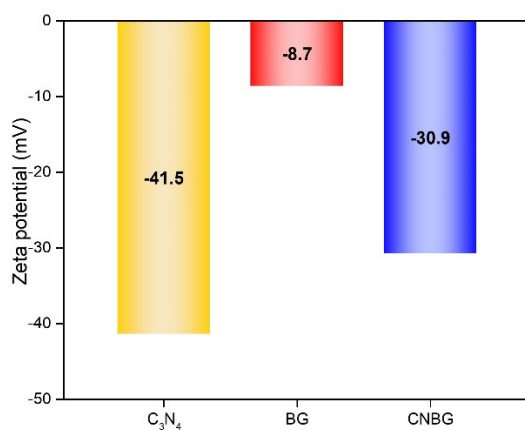

Fig. S1. Zeta potentials of the C<sub>3</sub>N<sub>4</sub>, BG, and CNBG.

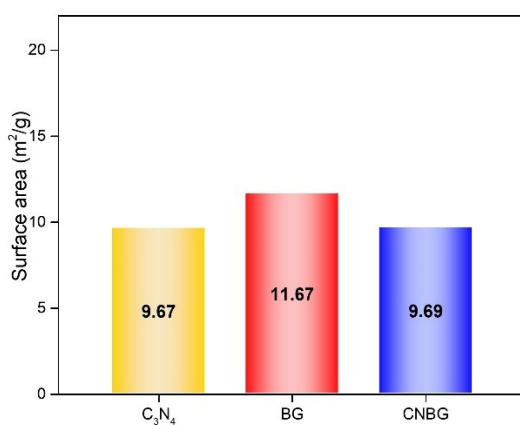

Fig. S2. Specific surface areas of the C<sub>3</sub>N<sub>4</sub>, BG, and CNBG.

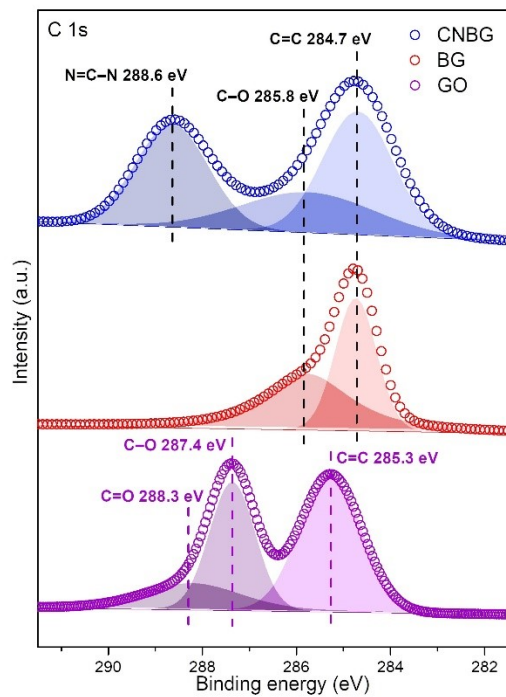

**Fig. S3. High-resolution C 1s XPS spectra of the GO, BG, and CNBG.**

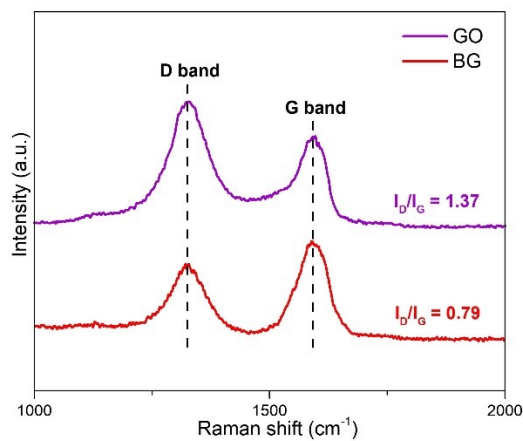

**Fig. S4. Raman spectra of the GO and BG.**

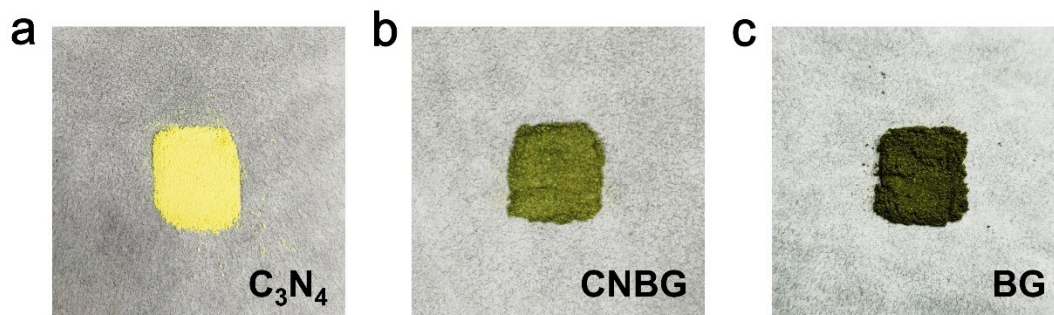

**Fig. S5. Digital photographs of the a) C<sub>3</sub>N<sub>4</sub>, b) CNBG, and c) BG.**

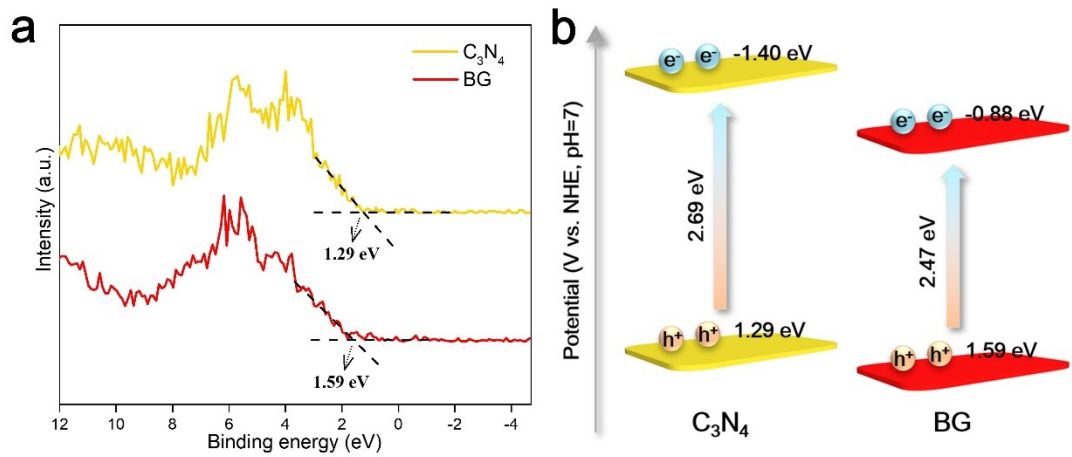

**Fig. S6. a) XPS valence band spectra of the  $C_3N_4$  and BG. Dashed lines mark baselines and tangents, the intersection value is the valence band edge. b) Energy band structure diagrams of the  $C_3N_4$  and BG.**

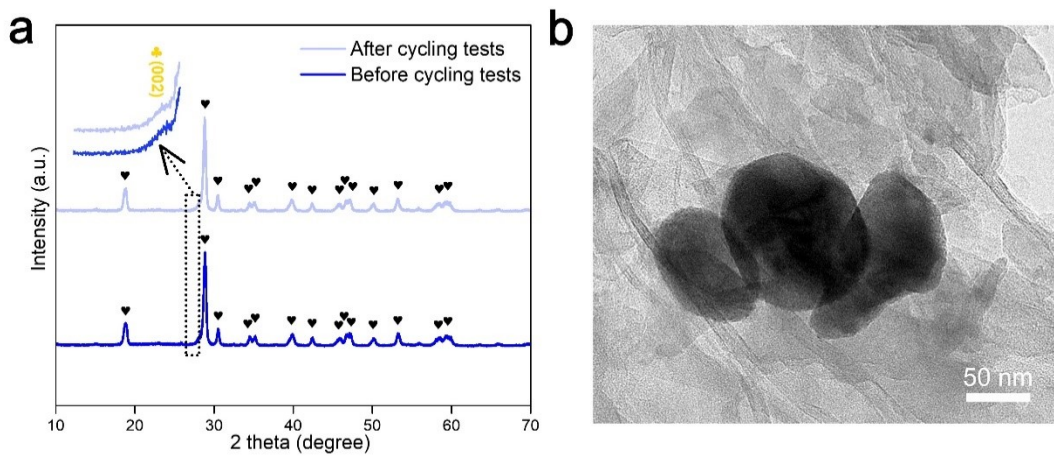

**Fig. S7. Characterizations for the CNBG before or after cycling tests. a) XRD patterns. b) The TEM image after cycling tests.**

## 2. Supplementary Tables

**Table S1. Comparison of apparent quantum efficiency (AQE) of the CNBG with reported photocatalysts.**

| Photocatalysts                                                    | AQE (%)        | References                                                                              |
|-------------------------------------------------------------------|----------------|-----------------------------------------------------------------------------------------|
| CNBG                                                              | 26.35 (420 nm) | This Work                                                                               |
| ZrO <sub>2</sub> /TaON/BiVO <sub>4</sub>                          | 12.3 (420 nm)  | <i>Nature Communications</i> . <b>2022</b> , <i>13</i> , 484.                           |
| O <sub>V</sub> -rich BG                                           | 23.19 (420 nm) | <i>ACS Applied Materials &amp; Interfaces</i> . <b>2022</b> , <i>14</i> , 12180-12192.  |
| IrO <sub>x</sub> -am@TiO <sub>2</sub>                             | 7.82 (425 nm)  | <i>ACS Catalysis</i> . <b>2020</b> , <i>10</i> , 8742-8750                              |
| 30-facets BiVO <sub>4</sub> polyhedron                            | 18.3 (430 nm)  | <i>Advanced Materials</i> . <b>2018</b> , <i>30</i> , 1703119                           |
| Ultrapure BiVO <sub>4</sub> /Graphene                             | 19.8 (420 nm)  | <i>Nanoscale</i> . <b>2020</b> , <i>12</i> , 14853-14862                                |
| CoAl <sub>2</sub> O <sub>4</sub> /g-C <sub>3</sub> N <sub>4</sub> | 0.2 (420 nm)   | <i>ACS Catalysis</i> . <b>2020</b> , <i>10</i> , 4960-4966                              |
| Au/Al <sub>2</sub> O <sub>3</sub> /TiO <sub>2</sub>               | 1.6 (420 nm)   | <i>Advanced Functional Materials</i> . <b>2020</b> , <i>281</i> , 2005688               |
| ZnO/BiVO <sub>4</sub>                                             | 5.0 (450 nm)   | <i>Nano Energy</i> . <b>2018</b> , <i>51</i> , 764-773                                  |
| <i>p</i> -BiOBr                                                   | 1.6 (405 nm)   | <i>Journal of the American Chemical Society</i> . <b>2022</b> , <i>144</i> , 3386-3397. |
| Zn <sub>0.2</sub> -PHI/PHI                                        | 3.6 (420 nm)   | <i>ACS Catalysis</i> . <b>2021</b> , <i>11</i> , 13463-13471                            |

**Table S2. Time-resolved PL decay curves were fitted by a biexponential function to calculate the fluorescence lifetime for the C<sub>3</sub>N<sub>4</sub>, BG, and CNBG.**

| Samples                       | $\tau_1$ (ns) | A <sub>1</sub> | $\tau_2$ (ns) | A <sub>2</sub> | $\tau_{av}$ (ns) | $\chi^2$ |
|-------------------------------|---------------|----------------|---------------|----------------|------------------|----------|
| C <sub>3</sub> N <sub>4</sub> | 0.87          | 1297.41        | 5.16          | 93.85          | 2.16             | 0.99     |
| BG                            | 0.88          | 774.42         | 6.11          | 353.62         | 4.86             | 0.99     |
| CNBG                          | 1.11          | 1122.03        | 13.17         | 21.89          | 3.38             | 0.99     |
